# Supplementary material
Source: publisher site journal article supplement (https://www.dovepress.com/article/415615)
Supplement: Supplementary file 1 [file get_supplementary_file.php]

**Supplementary Figure 1: Structured questionnaire (quantitative) (English)**

**Jimma University College of health sciences department of population and family health**

**Human nutrition unit**

**Part-I- Socio-demographic data**

| S. No | Questions | | Possible response | | |
| --- | --- | --- | --- | --- | --- |
| 1 | Residence | | 1.Urban  0. Rural | | |
| 2 | Age__ | | ___Years (age in completed years) | | |
| 3 | Age at marriage | | ___ Years (age in completed years) | | |
| 4 | Religion | | 1.Protestant  2.Orthodox  3.Catholic  4.Muslim  5.Others (specify) | | |
| 5 | What is the highest Educational level you  Completed? | | specify _________________ | | |
| 6 | What Ethnic group do you belong to? | | 1.Oromo  2. Amhara  3. Tigre  4. Gurage  5. Other specify | | |
| 7 | What is your Current Marital / relationship  Status? | | 1.Married  2.Single  3.Widowed  4.Divorced  5.Non married partner  6.No response | | |
| 8 | What is your current Occupation? | | 1. Employed  2. House wife  3. Daily laborers  4. Business  5.Other (specify) ___________ | | |
| 9 | Respondents husband occupation | | 1. Employed  2. Business  3. Farmer  4. Daily laborer  5.Other (specify) ___________ | | |
| 10 | Respondents husband educational status | | Specify__________ | | |
| 11 | Household size | | ___ Number | | |
| 12. **Household Wealth**  **Now I will ask you about some fixed assets that your household have.** | | | | | |
| Does the household have any of the following properties? **(Circle)** | | | | **Yes** | **No** |
| 12. 1 | | Functioning radio/Tape recorder/CD player | | 1 | 0 |
| 12. 2 | | Functioning Television | | 1 | 0 |
| 12. 3 | | Gas Stove | | 1 | 0 |
| 12. 4 | | Kerosene stove | | 1 | 0 |
| 12. 5 | | Electric stove | | 1 | 0 |
| 12. 6 | | Watch (Hand/Wall) | | 1 | 0 |
| 12. 7 | | Mobile phone | | 1 | 0 |
| 12. 8 | | Plough | | 1 | 0 |
| 12. 9 | | Sofa | | 1 | 0 |
| 12.10 | | Spring mattress | | 1 | 0 |
| 1211 | | Sponge/Foam mattress | | 1 | 0 |
| 12.12 | | Cotton mattress | | 1 | 0 |
| 12.13 | | Grass Mattress | | 1 | 0 |
| 12.14 | | Chair/Stool | | 1 | 0 |
| 12.15 | | Generator | | 1 | 0 |
| 12.16 | | Milling | | 1 | 0 |
| 12.17 | | Water pump | | 1 | 0 |
|  | | Does the household have any of the following animals? | | 1.Yes  0. No | How many? |
| 12.18 | | Oxen | |  |  |
| 12.19 | | Cows | |  |  |
| 12.20 | | Horse/mules | |  |  |
| 12.21 | | Goats/Sheep | |  |  |
| 12.22 | | Chickens | |  |  |
| 12.23 | | Donkey | |  |  |

**Part II- Maternal and social characteristics**

| **S. No** | **Questions** | **Responses** |
| --- | --- | --- |
| 13 | Number of Para | ____ Number |
| 14 | Number of gravid | ____ Number |
| 15 | Gestational age | _____months |
| 16 | What is the gap duration between pregnancies | ____years |
| 17 | Who is the head of your household? | 1. Husband 2. Myself  3. Other ( specify ) |
| 18 | Did you have family pressure to have more children? | 1.Yes  0. No |
| 19 | Did you get health and nutrition information? | 1. Yes  0. No |
|  | **Part III: Women’s decision-making power** |  |
| 20 | Who usually decides how the money you earn will be  used: you, your (husband/partner), or you and your  (Husband/partner) jointly? | Respondent . . . . . . . . . . . . .1  Husband/partner . . . . . . .2  Respondent and  Husband/partner jointly . . . . . . .3  other(specify)………….6 |
| 21 | Would you say that the money that you earn is more than what your (husband/partner) earns, less than what he earns, or about the same? | More than him . . . . . . . . .1  less than him . . . . . . . . . . 2  about the same . . . . . . . .3  husband/partner has  no earnings . . . . . . . . . . . . 4  (if response is 4 skip to ….next q  don't know . . . . . . . . . . . . .8 |
| 22 | Who usually decides how your (husband's/partner's) earnings will be used: you, your (husband/partner), or you and your (husband/partner) jointly? | Respondent . . . . . . . . . . . . 1  Husband/partner . . . . . .2  Respondent and  Husband/partner jointly . . . . . . .3 Husband/partner has no earnings. . 4  other (specify)…………6 |
| 23 | Who usually makes decisions about health care for  yourself: you, your (husband/partner), you and your  (husband/partner) jointly, or someone else? | Respondent . . . . . . . . . . . . 1  Husband/partner . . . . . .2  Respondent and husband/partner jointly . . . . . . . . . 3  Someone else . . . . . . . . . . 4  other . . . . . . . . . . . . . . . . . . .6 |
| 24 | Who usually makes decisions about making major household purchases? | Respondent . . . . . . . . . . . . 1  Husband/partner . . . . . .2  Respondent and  Husband/partner jointly . . . . . . .3  Someone else . . . . . . . . . . 4  other . . . . . . . . . . . . . . . . . . .6 |
| 25 | Is there anyone to participate in household food decisions and cooking other than you? | Yes . . . . . . . . . . . . . . . . . . . . . . 1  No . . . . . . . . . . . . . . . . . . . . . 2  No response/answer…………3 |
| 26 | Does your husband help you with household chores like looking after children, cooking, cleaning the house and doing other work around the house? | Yes . . . . . . . . . . . . . . . . . . . . . . 1  No . . . . . . . . . . . . . . . . . . . . . 2  Not living husband/partner….. 3 |
| 27 | Does he help you almost every day, at least once a week or rarely? | Almost every. . . . . . . . . . 1  At least once a week. …..2  rarely . . . . . . . . . . . . . . . . . .3 |
|  | **Part V- Knowledge on nutrition and health related questions** |  |
| 28 | What is the quantity of food taken during pregnancy? | 1. Less than before  2. Same as before  3. More than before |
| 29 | How should a pregnant woman eat in comparison with a non-pregnant woman to provide good nutrition to her baby and help him grow? **(more than one answer possible)** | 1. Eat more food (more energy)   - 1.1 Eat more at each meal (eat more food each day)   Or   - 1.2 Eat more frequently (eat more times each day)   2. Eat more protein-rich foods  3. Eat more iron-rich foods  4. Use iodized salt when preparing meals  5. Other  6. Don’t know |
| 30 | Do you think that weight gain during pregnancy is normal process? | 1. Yes  0. No  2. Don’t know |
| 31 | Most women would benefit from major types of supplements, or tablets, during pregnancy. Which are they? **(more than one answer possible)** | 1. Iron supplements  2. Folic acid supplements  3. Other  4. Don’t know |
| 32 | Have you heard about iron-deficiency anemia? | 1. Yes  0. No  2. Don’t know/no answer |
| 33 | If Yes: for question **No. 32** Can you tell me how you can recognize someone who has anemia?(**more than one answer could be possible)** | 1. Less energy/weakness  2. Paleness/pallor  3. Spoon nails/bent nails (koilonychia)  4. More likely to become sick (less immunity to infections)  5. Other  6. Don’t know |
| 34 | If Yes: for question **No. 32**  What are the health risks for pregnant women of a lack of iron in the diet? **(more than one answer could be possible)** | 1. Risk of dying during or after pregnancy  2. Difficult delivery  3. Other  4. Don’t know |
| 35 | If Yes: for question **No. 32**  What causes anemia? **(more than one answer could be possible)** | 1. Lack of iron in the diet/eat too little, not much  2. Sickness/infection (malaria, hookworm infection, other infection such as HIV/AIDS)  3. Heavy bleeding during menstruation  4. Other 5. Don’t know |
| 36 | How can anemia be prevented? (**more than one answer could be possible)** | 1. Eat/feed iron-rich foods/having a diet rich in iron  2. Eat/give vitamin-C-rich foods during or right after meals  3. Take/give iron supplements if prescribed  4. Treat other causes of anemia (diseases and infections) – seek health-care assistance  5. Other  6. Don’t know |
| 37 | If Yes: for question **No. 32**  Can you list examples of foods rich in iron? (**more than one answer could be possible)** | 1. Organ meat  2. Liver  3. Kidney  4. Heart  5. Flesh meat  6. Fish and seafood  7. Don't Know  8. other(specify)_______ |
| 38 | If Yes: for question **No. 32**  When taken during meals, certain foods help the body absorb and use iron. What are those foods? | 1. Vitamin-C-rich foods, such as fresh citrus fruits (orange, lemons, etc.)  2. Other  3 Don’t know |
| 39 | If Yes: for question **No. 32**  Some hot drinks and beverages decrease iron absorption when taken with meals. Which ones? (**more than one answer could be possible)** | 1. Coffee  2. Tea  3. Pepsi, Coca-cola  4. Other  5. Don’t know |
| 40 | Have you heard about vitamin A deficiency or lack of vitamin A? | 1. Yes  0. No  2. Don’t know/no answer |
| 41 | If Yes: to question **No.40**  Can you tell me how you can recognize someone who lacks vitamin A in her body? (**more than one answer could be possible)** | 1. Weakness/feels less energetic  2. Be more likely to become sick (less immunity to infections)  3. Eye problems: night blindness (inability to see at dusk and in dim light), dry  eyes, corneal damage, blindness  4. Other  5. Don’t know |
| 42 | If Yes: to question **No.40**  What causes a lack of vitamin A in the body? (**more than one answer could be possible)** | 1. Poor variety of foods  2. Eat too little food/not eat much (poor intake)  3. Other  4. Don’t know |
| 43 | If Yes: to question **No.40**  How can one prevent a lack of vitamin A in the body? (**more than one answer could be possible)** | 1. Eat/feed vitamin-A-rich foods/having/giving a diet rich in vitamin A  2. Eat/feed foods fortified with vitamin A  3. Give vitamin A supplements/sprinkles  4. Other 5. Don’t know |
| 44 | If Yes: to question **No.40**  Can you list examples of foods rich in vitamin A? Check for all the list if the answer is Yes;  Probe if necessary:  Do you know of any animal-source foods, vegetables or fruits that are rich in vitamin A? (**more than one answer could be possible)** | 1. Liver 2. Kidney 3. Heart 4. Egg 5. Milk, cheese, yogurt or other dairy product 6. Orange-colored vegetables 7. Orange sweet potato 8. Carrot 9. Pumpkin 10. Green vegetables 11. Spinach, cassava leaves, kale and other green leafy vegetables 12. Fruits (orange- or yellow-colored non-citrus fruits) 13. mango 14. papaya 15. Red palm oil 16. Other   18. Don’t know |
| 45 | Have you heard about iodine deficiency? | 1. Yes  0. No  2. Don’t know/no answer |
| 46 | If Yes: to questions **No. 45;** Can you tell me what it is?  Probe if necessary:  Can you describe the signs of a lack of iodine in the body?  (**more than one answer could be possible)** | 1. Apathy (lack of motivation and excitement)  2. Having difficulty working or studying  3. Goiter  4. Other  5. Don’t know |
| 47 | When a pregnant woman is undernourished, she is at risk of having a low-birth-weight baby, meaning that the baby is small or has a low birth weight. What are the health risks for these babies? (**more than one answer could be possible)** | 1.Slower growth and development  2. Risks of infections/being sick  3. Risks of dying  4. Risks of being undernourished/having micronutrient deficiencies  5.Risks of being sick once adult/developing chronic diseases in adulthood  (heart disease, high blood pressure, obesity, diabetes)  6. Other (specify)_____  7. Don’t know |
| 48 | If Yes: to questions **No. 45;** What could be the consequences or health risks of lack of iodine in the diet of a pregnant woman for the baby? (**more than one answer could be possible)** | 1. Risk of being mentally impaired  2. Risk of being physically damaged  3. Other 4. Don’t know |
| 49 | If Yes: to questions **No. 45;** How can iodine deficiency be prevented? (**more than one answer could be possible)** | 1. Eat/prepare foods with iodized salt  2. Other(specify)_____  3. Don’t know |
| 50 | If somebody develop fever during pregnancy what should be done? (**More than one answer** ) | 1. Seek treatment from health institution 2. She should take ant malaria drug 3. Nothing can do, subside by itself 4. Don’t know |
| 51 | After you have prepared dinner, kitchen surfaces, pots, pans, plates and utensils are dirty. Can you describe how you clean them usually? (**more than one answer could be possible)** | 1. Scrape excess food into rubbish bin  2. Wash with hot water  3. Wash with detergent  4. Don’t know/no answer |
| 52 | What should you do before eating raw fruits and vegetables? | 1. Wash them with clean water  2. Other(specify)_____  3. Don’t know |
| 53 | There are key moments when you need to wash your hands to prevent germs from reaching food.  What are these key moments? | 1. After going to the toilet/latrine  2.After cleaning a baby’s bottom/changing a baby’s nappy  3. Before preparing/handling food  4. Before feeding a child/eating  5. After handling raw food  6. After handling garbage  7. Other (specify)_____  8. Don’t know |
|  | **Part IV: Questions related to Attitude nutrition and health** |  |
| 54 | How likely do you believe you will have a low-birth-weight baby? | 1. Not likely  2. You’re not sure  3. Likely |
| 55 | If Not likely: to questions **No.54**  Can you tell me the reason why it is not likely? | **Reason __________________________** |
| 56 | How serious do you believe it is for your baby to have a low-birth-weight? | 1. Not serious  2. You’re not sure  3. Serious |
| 57 | If Not Serious: to question **No. 56**  Can you tell me the reason why it is not serious? | **Reasons__________________** |
| 58 | How good do you believe it is to eat more food during pregnancy? | 1. Not good  2. You’re not sure  3. Good |
| 59 | If Not good: to question **No. 58**  Can you tell me the reasons why it is not good? | **____________________** |
| 60 | How difficult do you feel about eating at least one additional meal during pregnancy? | 1. Not difficult  2. indifferent  3. Difficult |
| 61 | If Difficult: to question **No.60**  Can you tell me the reasons why it is difficult? | **_____________________** |
| 62 | How likely do you feel you are to be iron-deficient/ anemic? | 1. Not likely  2. You’re not sure  3. Likely |
| 63 | If Not likely: to question **No. 62**  Can you tell me the reason why it is not likely? | **Reason _____________________** |
| 64 | How serious do you feel iron-deficiency/anemia is? | 1. Not serious  2. You’re not sure  3. Serious |
| 65 | How good do you believe it is to prepare meals with iron-rich foods such as beef, chicken or liver? | 1. Not good  2. You’re not sure  3. Good |
| 66 | How difficult do you feel is it to prepare meals with iron-rich foods? | 1. Not difficult  2. Indifferent  3. Difficult |
| 67 | How confident do you feel in preparing meals with iron-rich foods? | 1. Not confident  2. Medium  3. Confident |
| 68 | How likely do you feel to have lack of vitamin A in your body? | 1. Not likely  2. You’re not sure  3. Likely |
| 69 | How serious do you think a lack of vitamin A is? | 1. Not serious  2. You’re not sure  3. Serious |
| 70 | How much do you like the taste of [**Liver, Kidney, Heart, Egg , Milk, cheese, yogurt or other dairy product, Orange-colored vegetables, Orange sweet potato, Carrot, Pumpkin, and Green vegetables]?**  Do you dislike it; you neither like it nor dislike it (neutral) or do you like it? Circle | **Liver** 1. Dislike 2. Neutral 3. Like  **Kidney** 1. Dislike 2. Neutral 3. Like  **Heart**1. 1. Dislike 2. Neutral 3. Like  **Egg** 1. Dislike 2. Neutral 3. Like  **Milk** 1. Dislike 2. Neutral 3. Like  **Cheese** 1. Dislike 2. Neutral 3. Like  **Yogurt** 1. Dislike 2. Neutral 3. Like  **Orange colored vegetables**  1. Dislike 2. Neutral 3. Like  **Orange sweet potato**  1. Dislike 2. Neutral 3. Like  **Carrot** 1. Dislike 2. Neutral 3. Like  **Pumpkin** 1. Dislike 2. Neutral 3. Like  **Green vegetables**  1. Dislike 2. Neutral 3. Like |
| 71 | How serious do you feel a lack of iodine in the body is? | 1. Not serious 2. . You’re not sure  3. Serious |
| 72 | How good do you feel it is to prepare meals with iodized salt? | 1. Not good  2. You’re not sure  3. Good |
| 73 | How difficult is it for you to buy and use iodized salt? | 1. Not difficult  2. So-so  3. Difficult |

**Thank you!**
